# Supplementary material for: International Comparison of Underlying Disease Among Recipients of Medical Assistance in Dying
Source: PubMed Central journal article supplement (PMC11791694; doi:10.1001/jamainternmed.2024.6643), 2024-12-09
Supplement: jamainternmed-e246643-s001.pdf [file jamainternmed-e246643-s001.pdf]

## Supplemental Online Content

Heidinger B, Webber C, Chambaere K, et al. International comparison of underlying disease among recipients of medical assistance in dying. *JAMA Intern Med*. Published online December 9, 2024. doi:10.1001/jamainternmed.2024.6643

### **eMethods.**

**eTable 1.** Jurisdictional MAID reports

**eTable 2.** Jurisdictional mortality data

**eTable 3.** Matched narrative descriptions of the most and least common underlying diseases for mortality ICD-10 chapters and subchapters by jurisdiction

**eTable 4.** MAID eligibility laws and regulations by jurisdiction

This supplementary material has been provided by the authors to give readers additional information about their work.

## **eMethods.**

### **Setting:**

The following jurisdictions were included in our analysis: Australia – Queensland, Australia – South Australia, Australia – Tasmania, Australia – Victoria, Australia – Western Australia, Belgium, Canada, Luxembourg, the Netherlands, New Zealand, Switzerland, US – California, US – Colorado, US – DC, US – Hawaii, US – Maine, US – New Jersey, US – Oregon, US – Vermont, US – Washington.

Some jurisdictions have national laws that allow MAID, whereas others, such as the United States and Australia, have differing MAID laws by state. Spain and Colombia have legal MAID, but were not included in this study as they did not have publicly available MAID data at the time of our analysis. **eTable 1** included sources for MAID reports by jurisdiction.

As Switzerland does not publish national MAID reports, we used data from a Swiss study that analyzed cause of death statistics for all deaths among Swiss permanent residents that occurred between 1999 to 2018 in Switzerland. To capture MAID deaths with ALS as the underlying disease in the Netherlands, we used data from a 2023 study covering all ALS MAID deaths between 2012 and 2020.

### **MAID decedents:**

For each jurisdiction, we recorded the total number of MAID deaths by year for all years with available data. We extracted this data from published MAID reports. We separately recorded the number of MAID deaths by year with the most frequently reported underlying diseases, including cancer, nervous system disease, circulatory disease, respiratory disease, endocrine disease, psychiatric conditions, digestive system disease, musculoskeletal disease, and genitourinary disease. We also recorded MAID deaths from amyotrophic lateral sclerosis (ALS), or MAID deaths from motor neuron disease if the number of ALS-specific deaths was not available. Finally, we recorded the number of MAID decedents with lung cancer, which is the most frequently reported cancer site among MAID recipients. Data availability varied by

jurisdiction and reporting year, with many earlier reports only including broad categories of underlying diagnoses (e.g., cancer vs. nervous system disease vs. other).

In most cases, MAID data included the underlying disease of those who received MAID. However, some jurisdictions only reported the underlying diseases of those who applied for MAID, regardless of whether they were found to be eligible (i.e., Queensland, Victoria, and New Zealand); those who were deemed eligible after an initial assessment but not necessarily further assessments, (i.e., Western Australia), or those who were deemed eligible for MAID but did not necessarily receive MAID (i.e., Tasmania and Colorado). MAID data including underlying disease from the aforementioned jurisdictions was combined for all analyses.

**All decedents:**

From each jurisdiction with available MAID data, we recorded yearly mortality data extracted from public death registrars and reports. When available, we recorded the total number of deaths, as well as deaths corresponding to the following International Classification of Diseases 10<sup>th</sup> Revision (ICD-10) chapters: neoplasms (C00-D48), endocrine, nutritional and metabolic diseases (E00-E90), mental and behavioural disorders (F00-F99), diseases of the nervous system (G00-G99), diseases of the circulatory system (I00-I99), diseases of the respiratory system (J00-J99), diseases of the digestive system (K00-K93) diseases of the musculoskeletal system and connective tissue (M00-M99), and diseases of the genitourinary system (N00-N99). We also recorded Amyotrophic Lateral Sclerosis (ALS) (G12.21), or motor neuron disease (G12.2) if data for G12.21 was not available. Finally, we recorded lung cancer deaths, which corresponded to the ICD-10 Code “malignant neoplasm of bronchus and lung” (C34).

We compared data on the underlying disease of MAID recipients with data on population mortality cause of death. Most MAID reports used narrative diagnostic categories, such as “neurological conditions”, “cancer”, and “cardiovascular conditions,” whereas population mortality data are

categorized using ICD-10 codes. We compared the narrative definitions in MAID deaths to their relevant ICD-10 chapters or subchapters for population mortality as appropriate (e.g., MAID deaths reported with an underlying disease of “neurological conditions” were compared with total deaths due to diseases of the nervous system, ICD-10 G00-G99). For example, Luxembourg’s MAID report included a MAID underlying disease category of “neurovascular disease”, which we included in the “diseases of the circulatory system” subchapter, whereas deaths with an underlying diagnosis of “neurodegenerative disease” were included with “diseases of the nervous system”.

We recorded and analyzed MAID and mortality data by calendar year. When MAID reporting periods cut across calendar years (e.g., Western Australia- July 1<sup>st</sup>, 2021, to June 30<sup>th</sup>, 2022), we compared this data to mortality data from the closest available calendar year (i.e., January 1<sup>st</sup>, 2021 to December 31<sup>st</sup>, 2021). For example, we compared Canada 2022 MAID data with 2021 mortality data, as mortality data for 2022 was not released at the time of analysis.

When MAID reporting periods included partial years (i.e., when a jurisdiction initiated a MAID program in the middle of the year), such as New Jersey from August 1<sup>st</sup>, 2019 to December 31<sup>st</sup>, 2019, this data was duration-matched with available mortality data as closely as possible. For example, to duration-match data for New Jersey’s first reporting period, as it only included 152 days, we used a fraction of 152/365 of 2019 deaths.

Finally, for jurisdictions that release MAID reports spanning multiple years, we used the previously described methods to match data by duration and time. For example, Victoria published a MAID report from June 19<sup>th</sup>, 2019, to June 30<sup>th</sup>, 2023, spanning four years and twelve days. To calculate the number of duration-matched deaths, we added together 2019 deaths, 2020 deaths, 2021 deaths, 2022 deaths, and a fraction of 12/365 of 2019 deaths. MAID data was excluded from our analyses of relative risk over time if it came from reports spanning multiple years.

## **Statistical Analysis**

We used descriptive statistics to characterize overall MAID incidence by jurisdiction and underlying disease. To compare MAID proportion by underlying disease, we calculated the proportion of each disease group that received MAID, and then calculated the relative risk of receiving MAID for each disease by dividing the MAID proportion for each disease by the MAID proportion for all cancer diagnoses (the reference value) using a multilevel negative binomial regression model. Jurisdictions were modelled as a random effect due to the clustering of observations within jurisdictions, and independent variables included underlying disease and year (recognizing that some jurisdictions had many more years of data than others). We then created forest plots showing the relative risk of receiving MAID for each diagnosis compared with all cancer diagnoses, as well as showing how these relative risks compare across jurisdictions. We also used regression models to calculate how MAID by underlying disease changes over time.

We also included a model analyzing the effect of the type of MAID available (PAS only vs. PAS and Euthanasia) and the presence or absence of a prognostic criterion. We had to remove jurisdiction from this model, as there was considerable overlap between these two factors among jurisdictions.

## **Ethics**

This study did not require Research Ethics Board approval as per Ottawa Health Science Network – Research Ethics Board policy SOP 102.003.

**eTable 1.** Jurisdictional MAID reports

| Jurisdiction                  | Title of Most Recent MAID Report                                                                                                         | Reporting Period of Most Recent MAID Report | Source                                                                                                                                                                                                                                                                                                                                                                                                                                                                            |
|-------------------------------|------------------------------------------------------------------------------------------------------------------------------------------|---------------------------------------------|-----------------------------------------------------------------------------------------------------------------------------------------------------------------------------------------------------------------------------------------------------------------------------------------------------------------------------------------------------------------------------------------------------------------------------------------------------------------------------------|
| Australia – Queensland        | Voluntary Assisted Dying Review Board Annual Report 2022-2023                                                                            | January 1, 2023 – June 30, 2023             | <a href="https://www.health.qld.gov.au/_data/assets/pdf_file/0024/1261185/vad-annual-report-2022-23.pdf">https://www.health.qld.gov.au/_data/assets/pdf_file/0024/1261185/vad-annual-report-2022-23.pdf</a>                                                                                                                                                                                                                                                                       |
| Australia – South Australia   | Voluntary Assisted Dying Review Board Annual Report 2022-2023                                                                            | January 31, 2023 – June 30, 2023            | <a href="https://www.sahealth.sa.gov.au/wps/wcm/connect/c502e159-2307-4b27-9968-a06c41d219ad/23116.1+Voluntary+Assisted+Dying+Annual+Report_V9_WEB3.pdf?MOD=AJPERES&amp;CACHEID=ROOTWORKSPACE-c502e159-2307-4b27-9968-a06c41d219ad-oLmvJkb">https://www.sahealth.sa.gov.au/wps/wcm/connect/c502e159-2307-4b27-9968-a06c41d219ad/23116.1+Voluntary+Assisted+Dying+Annual+Report_V9_WEB3.pdf?MOD=AJPERES&amp;CACHEID=ROOTWORKSPACE-c502e159-2307-4b27-9968-a06c41d219ad-oLmvJkb</a> |
| Australia – Tasmania          | Voluntary Assisted Dying in Tasmania Voluntary Assisted Dying Commission Annual Report 2022-2023                                         | October 23, 2022 – June 30, 2023            | <a href="https://www.health.tas.gov.au/sites/default/files/2023-10/voluntary_assisted_dying_commission_annual_report_2022-23.pdf">https://www.health.tas.gov.au/sites/default/files/2023-10/voluntary_assisted_dying_commission_annual_report_2022-23.pdf</a>                                                                                                                                                                                                                     |
| Australia – Victoria          | Voluntary Assisted Dying Review Board Annual Report July 2022 to June 2023                                                               | July 1, 2022 – June 30, 2023                | <a href="https://www.safercare.vic.gov.au/sites/default/files/2023-08/VADRB%20Annual%20Report%202022-23.pdf">https://www.safercare.vic.gov.au/sites/default/files/2023-08/VADRB%20Annual%20Report%202022-23.pdf</a>                                                                                                                                                                                                                                                               |
| Australia – Western Australia | Voluntary Assisted Dying Board Western Australia Annual Report 2022-23                                                                   | July 1, 2022 – June 30, 2023                | <a href="https://www.health.wa.gov.au/~/_media/Corp/Documents/Health-for/Voluntary-assisted-dying/VAD-Board-Annual-Report-2022-23.pdf">https://www.health.wa.gov.au/~/_media/Corp/Documents/Health-for/Voluntary-assisted-dying/VAD-Board-Annual-Report-2022-23.pdf</a>                                                                                                                                                                                                           |
| Belgium                       | Communiqué de presse de la Commission fédérale de Contrôle et d'Évaluation de l'Euthanasie – CFCEE EUTHANASIE – Chiffres de l'année 2022 | January 1, 2022 – December 31, 2022         | <a href="https://organesdeconcertation.sante.belgique.be/fr/documents/euthanasie-chiffres-de-lannee-2022">https://organesdeconcertation.sante.belgique.be/fr/documents/euthanasie-chiffres-de-lannee-2022</a>                                                                                                                                                                                                                                                                     |
| Canada                        | Fourth annual report on Medical Assistance in Dying in Canada 2022                                                                       | January 1, 2022 – December 31, 2022         | <a href="https://www.canada.ca/en/health-canada/services/publications/health-system-services/annual-report-medical-assistance-dying-2022.html">https://www.canada.ca/en/health-canada/services/publications/health-system-services/annual-report-medical-assistance-dying-2022.html</a>                                                                                                                                                                                           |
| Luxembourg                    | Septième rapport de la loi du 16 mars 2009 sur l'euthanasie et l'assistance au suicide (années 2021 et 2022)                             | January 1, 2021 – December 31, 2022         | <a href="https://sante.public.lu/fr/publications/r/rapport-euthanasie-2021-2022.html">https://sante.public.lu/fr/publications/r/rapport-euthanasie-2021-2022.html</a>                                                                                                                                                                                                                                                                                                             |
| The Netherlands               | Regional Euthanasia Review Committees Annual Report 2022                                                                                 | January 1, 2022 – December 31, 2022         | <a href="https://english.euthanasiecommissie.nl/the-committees/documents/publications/annual-reports/2002/annual-reports/annual-reports">https://english.euthanasiecommissie.nl/the-committees/documents/publications/annual-reports/2002/annual-reports/annual-reports</a>                                                                                                                                                                                                       |

|                 |                                                                                                                                                                                                                |                                       |                                                                                                                                                                                                                                                                                                                                                        |
|-----------------|----------------------------------------------------------------------------------------------------------------------------------------------------------------------------------------------------------------|---------------------------------------|--------------------------------------------------------------------------------------------------------------------------------------------------------------------------------------------------------------------------------------------------------------------------------------------------------------------------------------------------------|
| The Netherlands | Frequency of euthanasia, factors associated with end-of-life practices, and quality of end-of-life care in patients with amyotrophic lateral sclerosis in the Netherlands: a population-based cohort study(20) | January 1, 2012 – December 31, 2020   | Eenennaam RM van, Kruithof W, Beelen A, Bakker LA, Eijk RPA van, Maessen M, et al. Frequency of euthanasia, factors associated with end-of-life practices, and quality of end-of-life care in patients with amyotrophic lateral sclerosis in the Netherlands: a population-based cohort study. <i>The Lancet Neurology</i> . 2023 Jul 1;22(7):591–601. |
| New Zealand     | Assisted Dying Service – Ngā Ratonga Mate Whakaahuru Registrar (assisted dying) Annual Report to the Minister of Health – June 2023                                                                            | April 1, 2022 – March 31, 2023        | <a href="https://www.health.govt.nz/system/files/documents/publications/registrar-assisted-dying-annual-report-2023-july23.pdf">https://www.health.govt.nz/system/files/documents/publications/registrar-assisted-dying-annual-report-2023-july23.pdf</a>                                                                                              |
| Switzerland     | Long-term experience on assisted suicide in Switzerland: dementia, mental disorders, age-related polymorbidity and the slippery slope argument(21)                                                             | January 1, 1999 – December 31, 2018   | Güth U, Junker C, McMillan S, Elfgen C, Schneeberger AR. Long-term experience on assisted suicide in Switzerland: dementia, mental disorders, age-related polymorbidity and the slippery slope argument. <i>Public Health</i> . 2023 Oct 1;223:249–56.                                                                                                 |
| US – California | California End of Life Option Act 2022 Data Report                                                                                                                                                             | January 1, 2022 – December 31, 2022   | <a href="https://www.cdph.ca.gov/Programs/CHSI/CDPH%20Document%20Library/CDPH_End_of_Life%20Option_Act_Report_2022_FINAL.pdf">https://www.cdph.ca.gov/Programs/CHSI/CDPH%20Document%20Library/CDPH_End_of_Life%20Option_Act_Report_2022_FINAL.pdf</a>                                                                                                  |
| US – Colorado   | Colorado End-of-Life Options Act, 2022 Data Summary, with 2017-2022 trends and totals                                                                                                                          | January 1, 2017 – December 31, 2022   | <a href="https://cdphe.colorado.gov/center-for-health-and-environmental-data/registries-and-vital-statistics/medical-aid-in-dying#Annual">https://cdphe.colorado.gov/center-for-health-and-environmental-data/registries-and-vital-statistics/medical-aid-in-dying#Annual</a>                                                                          |
| US – DC         | District of Columbia Death with Dignity Act 2022 Data Summary                                                                                                                                                  | February 19, 2021 – February 18, 2022 | <a href="https://dchealth.dc.gov/sites/default/files/dc/sites/doh/publication/attachments/2022%20Death%20with%20Dignity%20Annual%20Report.pdf">https://dchealth.dc.gov/sites/default/files/dc/sites/doh/publication/attachments/2022%20Death%20with%20Dignity%20Annual%20Report.pdf</a>                                                                |
| US – Hawaii     | Hawaii Department of Health (DOH) 2021 Our Care Our Choice Annual Report (DOH)                                                                                                                                 | January 1, 2021 – December 31, 2021   | <a href="https://health.hawaii.gov/opppd/files/2022/07/corrected-MAID-2021-Annual-Report.pdf">https://health.hawaii.gov/opppd/files/2022/07/corrected-MAID-2021-Annual-Report.pdf</a>                                                                                                                                                                  |
| US – Maine      | Report to The Maine Legislature Patient-Directed Care 2022 Annual Report                                                                                                                                       | January 1, 2022 – December 31, 2022   | <a href="https://www.mainedeathwithdignity.org/wp-content/uploads/2023/05/Patient-Directed-Care-Annual-Report-CY-2022.pdf">https://www.mainedeathwithdignity.org/wp-content/uploads/2023/05/Patient-Directed-Care-Annual-Report-CY-2022.pdf</a>                                                                                                        |
| US – New Jersey | New Jersey Medical Aid in Dying for the Terminally Ill Act 2022 Data Summary                                                                                                                                   | January 1, 2022 – December 31, 2022   | <a href="https://www.nj.gov/health/advancedirective/documents/maid/MAidAnnualReport2022.pdf">https://www.nj.gov/health/advancedirective/documents/maid/MAidAnnualReport2022.pdf</a>                                                                                                                                                                    |
| US – Oregon     | Oregon Death with Dignity Act Data 2021 Data Summary                                                                                                                                                           | January 1, 2022 – December 31, 2022   | <a href="https://www.oregon.gov/oha/PH/PROVIDERPARTNERRESOURCES/EVALUATIONRESEARCH/DEATHWITHDIGNITYACT/Documents/year24.pdf">https://www.oregon.gov/oha/PH/PROVIDERPARTNERRESOURCES/EVALUATIONRESEARCH/DEATHWITHDIGNITYACT/Documents/year24.pdf</a>                                                                                                    |
| US – Vermont    | Report to the Vermont Legislature                                                                                                                                                                              | July 1, 2019 – June 30, 2021          | <a href="https://legislature.vermont.gov/assets/Legislative-Reports/2022-Patient-Choice-Legislative-Report.Final.pdf">https://legislature.vermont.gov/assets/Legislative-Reports/2022-Patient-Choice-Legislative-Report.Final.pdf</a>                                                                                                                  |

|                 |                                                      |                                        |                                                                                                                                                                                     |
|-----------------|------------------------------------------------------|----------------------------------------|-------------------------------------------------------------------------------------------------------------------------------------------------------------------------------------|
|                 | Report Concerning Patient Choice at the End of Life  |                                        |                                                                                                                                                                                     |
| US – Washington | Report to the Legislature<br>2022 Death with Dignity | January 1, 2022 –<br>December 31, 2022 | <a href="https://doh.wa.gov/sites/default/files/2023-10/422-109-DeathWithDignityAct2022.pdf">https://doh.wa.gov/sites/default/files/2023-10/422-109-DeathWithDignityAct2022.pdf</a> |



**eTable 2.** Jurisdictional mortality data

| Jurisdiction                                                                          | Source                                                                                                                                                                                                                                                                                                                                                                                                                                                                                              |
|---------------------------------------------------------------------------------------|-----------------------------------------------------------------------------------------------------------------------------------------------------------------------------------------------------------------------------------------------------------------------------------------------------------------------------------------------------------------------------------------------------------------------------------------------------------------------------------------------------|
| Australia – Queensland, South Australia, Tasmania, Victoria, Western Australia        | Australian Bureau of Statistics 2022. Causes of Death, Australia. Accessed August 27, 2024. <a href="https://www.abs.gov.au/statistics/health/causes-death/causes-death-australia/latest-release">https://www.abs.gov.au/statistics/health/causes-death/causes-death-australia/latest-release</a>                                                                                                                                                                                                   |
| Belgium                                                                               | Statbel. Causes de décès. Accessed August 27, 2024. <a href="https://statbel.fgov.be/fr/themes/population/mortalite-et-esperance-de-vie/causes-de-deces#panel-13">https://statbel.fgov.be/fr/themes/population/mortalite-et-esperance-de-vie/causes-de-deces#panel-13</a>                                                                                                                                                                                                                           |
| Canada                                                                                | Statistics Canada. Table 13-10-0145-01 Deaths, by cause, Chapter VI: Diseases of the nervous system (G00 to G99). Accessed August 27, 2024. <a href="https://doi.org/10.25318/1310014501-eng">https://doi.org/10.25318/1310014501-eng</a>                                                                                                                                                                                                                                                           |
| Luxembourg                                                                            | Saleh S., Abad D., Weiss J. (2023). Statistiques des causes de décès au Luxembourg pour l'année 2022, Direction de la santé, Luxembourg. <a href="https://sante.lu/statistiques-causes-deces">sante.lu/statistiques-causes-deces</a>                                                                                                                                                                                                                                                                |
| The Netherlands                                                                       | CBS StatLine. Deaths; underlying cause of death (shortlist), sex, age. Accessed August 27, 2024. <a href="https://opendata.cbs.nl/statline/#/CBS/en/dataset/7052eng/table?dl=AB92B">https://opendata.cbs.nl/statline/#/CBS/en/dataset/7052eng/table?dl=AB92B</a>                                                                                                                                                                                                                                    |
| The Netherlands (ALS)                                                                 | Van Eenennaam RM, Kruithof W, Beelen A, et al. Frequency of euthanasia, factors associated with end-of-life practices, and quality of end-of-life care in patients with amyotrophic lateral sclerosis in the Netherlands: a population-based cohort study. <i>The Lancet Neurology</i> . 2023;22(7):591-601. doi:10.1016/S1474-4422(23)00155-2                                                                                                                                                      |
| New Zealand                                                                           | Health New Zealand. Mortality data web tool. Accessed August 27, 2024. <a href="https://tewhatuora.shinyapps.io/mortality-web-tool/">https://tewhatuora.shinyapps.io/mortality-web-tool/</a>                                                                                                                                                                                                                                                                                                        |
| Switzerland                                                                           | Güth U, Junker C, McMillan S, Elfgen C, Schneeberger AR. Long-term experience on assisted suicide in Switzerland: dementia, mental disorders, age-related polymorbidity and the slippery slope argument. <i>Public Health</i> . 2023;223:249-256. doi:10.1016/j.puhe.2023.08.001                                                                                                                                                                                                                    |
| US – California, Colorado, DC, Hawaii, Maine, New Jersey, Oregon, Vermont, Washington | Centers for Disease Control and Prevention, National Center for Health Statistics. National Vital Statistics System, Mortality 1999-2020 on CDC WONDER Online Database, released in 2021. Data are from the Multiple Cause of Death Files, 1999-2020, as compiled from data provided by the 57 vital statistics jurisdictions through the Vital Statistics Cooperative Program. Accessed August 27, 2024. <a href="https://wonder.cdc.gov/ucd-icd10.html">https://wonder.cdc.gov/ucd-icd10.html</a> |

**eTable 3.** Matched narrative descriptions of the most and least common underlying diseases for mortality ICD-10 chapters and subchapters by jurisdiction

**eTable 3A.** Matched narrative descriptions of the most common underlying diseases for mortality ICD-10 chapters and subchapters by jurisdiction.

| Jurisdiction                  | Mortality data – ICD-10 chapter or subchapter |                                                         |                                                 |                                                              |                                       |
|-------------------------------|-----------------------------------------------|---------------------------------------------------------|-------------------------------------------------|--------------------------------------------------------------|---------------------------------------|
|                               | C00–D48 - Neoplasms                           | G00–G99 - Diseases of the nervous system                | I00–I99 - Diseases of the circulatory system    | J00–J99 - Diseases of the respiratory system                 | G12.2 - Motor Neurone or G12.21 - ALS |
| Australia – Queensland        | Cancer                                        | Neurological disorder                                   |                                                 | Disease of the respiratory system                            |                                       |
| Australia – South Australia   | Malignancy                                    | Neurodegenerative disease                               |                                                 | Respiratory failure                                          |                                       |
| Australia – Tasmania          | Cancer                                        | Neurodegenerative                                       |                                                 | Respiratory                                                  |                                       |
| Australia – Victoria          | Cancer                                        | Neurological                                            |                                                 | Respiratory                                                  | Motor Neurone Disease                 |
| Australia – Western Australia | Cancer related                                | Neurological                                            |                                                 | Respiratory-related                                          |                                       |
| Belgium                       | Cancer                                        | Diseases of the nervous system                          | Diseases of the circulatory system              | Diseases of the respiratory system                           |                                       |
| Canada                        | Cancer                                        | Neurological                                            | Cardiovascular                                  | Respiratory                                                  | ALS                                   |
| Luxembourg                    | Cancer                                        | Neurodegenerative diseases                              | Neurovascular diseases                          |                                                              |                                       |
| The Netherlands               | Cancer                                        | Neurological disorders                                  | Cardiovascular disease                          | Pulmonary disorders                                          | ALS                                   |
| New Zealand                   | Cancer                                        | Neurological condition                                  | Cardiovascular condition                        | Chronic respiratory disease                                  |                                       |
| Switzerland                   | Cancer                                        | Neurodegenerative diseases                              | Cardiovascular diseases                         | Lung diseases                                                | ALS                                   |
| US – California               | Malignant neoplasms                           | Neurological disease                                    | Cardiovascular disease                          | Respiratory disease                                          |                                       |
| US – Colorado                 | Malignant neoplasms                           | Progressive neurological or neurodegenerative disorders | Cardiovascular disease; Cerebrovascular disease | Chronic lower respiratory disease; Interstitial lung disease | ALS                                   |
| US – DC                       | Cancer; Brain tumour                          | ALS                                                     | Congestive heart failure                        |                                                              | ALS                                   |
| US – Hawaii*                  |                                               |                                                         |                                                 |                                                              |                                       |

|                 |                                   |                                              |                           |                                   |     |
|-----------------|-----------------------------------|----------------------------------------------|---------------------------|-----------------------------------|-----|
| US – Maine      | All cancers                       | Multiple Sclerosis, ALS, Parkinson’s Disease | Cardiac                   | Pulmonary disease, COPD           | ALS |
| US – New Jersey | Malignancy                        | Neuro-degenerative disease                   | Cardiovascular disease,   | Pulmonary disease                 |     |
| US – Oregon     | Cancer (non-lung), Cancer (lung), | Neurological disease                         | Heart/circulatory disease | Respiratory disease [e.g., COPD], | ALS |
| US – Vermont    | Cancer                            | ALS, Neurodegenerative disorders             |                           |                                   | ALS |
| US – Washington |                                   | Neurodegenerative                            | Cardiovascular            | Respiratory                       |     |

**Note:** Included underlying diseases are quoted directly from MAID reports and translated when English reports were not available.

\*Hawaii’s MAID report provides the specific narrative diagnosis for each individual MAID case.

**eTable 3B.** Matched narrative descriptions of less common underlying diseases for mortality ICD-10 chapters and subchapters by jurisdiction.

|                 | <b>E00–E90 - Endocrine, nutritional, and metabolic disease</b> | <b>F00–F99 - Mental and behavioural disorders</b> | <b>K00–K93 - Diseases of the digestive system</b> | <b>M00–M99 - Diseases of the musculoskeletal system and connective tissue</b> |
|-----------------|----------------------------------------------------------------|---------------------------------------------------|---------------------------------------------------|-------------------------------------------------------------------------------|
| Belgium         | Diseases of the endocrine, nutritional, and metabolic system   | Psychiatric conditions                            | Diseases of the digestive system                  | Diseases of the musculoskeletal system and connective tissue                  |
| The Netherlands |                                                                | Psychiatric disorders                             |                                                   |                                                                               |
| Switzerland     |                                                                |                                                   |                                                   | Musculoskeletal diseases                                                      |
| US – Colorado   |                                                                |                                                   | Chronic liver disease                             |                                                                               |
| US – Oregon     | Endocrine/metabolic disease [e.g, diabetes],                   |                                                   | Gastrointestinal disease [e.g., liver disease]    |                                                                               |

**eTable 4.** MAID eligibility laws and regulations by jurisdiction

| <b>Jurisdiction</b>                  | <b>Legal method(s) of MAID*</b> | <b>Prognosis requirement</b>                          | <b>Age requirement</b> |
|--------------------------------------|---------------------------------|-------------------------------------------------------|------------------------|
| <b>Australia – Queensland</b>        | PAS and Euthanasia              | <6 months, <12 months for neurodegenerative condition | 18                     |
| <b>Australia – South Australia</b>   | PAS and Euthanasia**            | <6 months, <12 months for neurodegenerative condition | 18                     |
| <b>Australia – Tasmania</b>          | PAS and Euthanasia              | <6 months, <12 months for neurodegenerative condition | 18                     |
| <b>Australia – Victoria</b>          | PAS and Euthanasia**            | <6 months, <12 months for neurodegenerative condition | 18                     |
| <b>Australia – Western Australia</b> | PAS and Euthanasia              | <6 months, <12 months for neurodegenerative condition | 18                     |
| <b>Belgium</b>                       | PAS and Euthanasia              | None                                                  | None                   |
| <b>Canada</b>                        | PAS and Euthanasia              | None***                                               | 18                     |
| <b>Luxembourg</b>                    | PAS and Euthanasia              | None                                                  | 18                     |
| <b>The Netherlands</b>               | PAS and Euthanasia              | None                                                  | 12                     |
| <b>New Zealand</b>                   | PAS and Euthanasia              | <6 months                                             | 18                     |
| <b>Switzerland</b>                   | PAS only                        | None                                                  | None                   |
| <b>US – California</b>               | PAS only                        | <6 months                                             | 18                     |
| <b>US – Colorado</b>                 | PAS only                        | <6 months                                             | 18                     |
| <b>US – DC</b>                       | PAS only                        | <6 months                                             | 18                     |
| <b>US – Hawaii</b>                   | PAS only                        | <6 months                                             | 18                     |

|                        |          |           |    |
|------------------------|----------|-----------|----|
| <b>US – Maine</b>      | PAS only | <6 months | 18 |
| <b>US – New Jersey</b> | PAS only | <6 months | 18 |
| <b>US – Oregon</b>     | PAS only | <6 months | 18 |
| <b>US – Vermont</b>    | PAS only | <6 months | 18 |
| <b>US – Washington</b> | PAS only | <6 months | 18 |

\*PAS: Physician-Assisted Suicide; Euthanasia: Physician-Administered Voluntary Euthanasia

\*\*In Victoria and South Australia, legislation includes procedural steps making Euthanasia much more challenging to access than PAS, so that >85% of MAID recipients use PAS. This compares to Western Australia, New South Wales and Queensland, where <35% use PAS. ([www.gogentleaustralia.org.au/state\\_of\\_vad\\_report](http://www.gogentleaustralia.org.au/state_of_vad_report))

\*\*\*In Canada, until March 2021, MAID recipients had to be at a point where their “natural death” had become “reasonably foreseeable”. There is currently no prognostic exclusion criterion in Canada, but >97% of MAID recipients still meet this criterion.
